24 **Note:** This study is a master's thesis. The study was approved by the members of the thesis jury.

25

26

27 **CRedit author statement**

28 Aysegul Durmaz: Conceptualization, Formal analysis, Investigation, Methodology, Project  
29 administration, Resources, Software, Supervision, Validation, Visualization, Writing- Original  
30 draft preparation, Writing- Reviewing and Editing.

31 Merve Ekiz: Conceptualization, Data curation, Formal analysis, Funding acquisition  
32 Investigation, Resources, Software, Supervision, Validation, Visualization, Writing- Original  
33 draft preparation, Writing- Reviewing and Editing.

34 **Conflicts of Interest and Source of Funding**

35 **Funding:** This research did not receive any specific grant from funding agencies in the public,  
36 commercial, or not-for-profit sectors.

37 **Conflicts of Interest:** The authors declare no conflict of interest.

38

39

40

41

42

43

44



66 **Conclusion:** It is important that women who have obesity problems in the preconception period  
67 are counseled to help them reach a normal BMI. Health care professionals should advise women  
68 on healthy nutrition and weight control during both the pregnancy and postpartum periods.

69 **Keywords:** maternal; obesity; weight; body mass index; postpartum

## 70 **Introduction**

71 Obesity is a common, serious, and costly disease [1]. The term obesity is used for greater weight  
72 gain than is generally considered healthy for a given height [2,3]. A body mass index (BMI) of  
73 30 kg/m<sup>2</sup> or above in pregnancy at the time of first prenatal follow-up is defined as maternal  
74 obesity [4]. BMI is used to determine overweight or obesity [5]. BMI is a person's weight (in  
75 kg) divided by their height in meters squared (BMI=Kg/m<sup>2</sup>). WHO defines women who have a  
76 BMI of 25 kg/m<sup>2</sup> or above as overweight, and women with a BMI of 30 kg/ m<sup>2</sup> or above are  
77 defined as obese.

78 Globally, there are more obese people than underweight people. This occurs in all regions  
79 except sub-Saharan Africa and some parts of Asia. In WHO regions, the rate of BMI $\geq$ 30 kg/m<sup>2</sup>  
80 was determined as 29% in the Americas, 25.3% in Europe, 19.5% in the Middle East, and 4.6%  
81 in South-East Asia. The proportion of women with BMI values equal to or greater than 30 kg/m<sup>2</sup>  
82 was reported to be 31.7% in the USA, 27.1% in Europe, 24.3% in the Middle East, and 6% in  
83 South-East Asia [6]. In the 2018 report of the Turkey Demographic and Health Survey, it was  
84 specified that 29% of women aged 15-49 were overweight, and 30% were obese [7]. In parallel  
85 with the increase in obesity in the general population, the incidence of obesity in pregnancy  
86 increases worldwide [8]. A study which examined the most recent version of the four national  
87 population guidelines reported an increase in the rates of obesity in pregnant women in parallel  
88 with the increase in the general population [9]. The Royal College of Obstetricians and

89 Gynaecologists reported that 21.3% of the UK population is obese, and less than half (47.3%)  
90 of pregnant women have a normal BMI [10]. In a study conducted in Australia, it was found  
91 that 55% of pregnant women were overweight or obese, and 43.6% gained more weight than  
92 recommended during pregnancy [11].

93 Obesity in pregnancy is considered a high-risk condition as it is associated with many  
94 complications [12]. Health risks for obese pregnant women were reported in a systematic  
95 review. These included gestational diabetes, gestational hypertension, preeclampsia, antenatal  
96 anxiety, and mental health problems including depression and postpartum depression, increased  
97 rates of cesarean section, instrumental delivery, and increased rates of post-cesarean section  
98 surgical site infections [13]. It is known that obese pregnant women who gain less than 5 kg of  
99 weight during pregnancy have a decrease in the incidence of risky conditions such as  
100 hypertension, eclampsia, gestational diabetes, and cesarean section. It was observed that there  
101 was an increase in maternal risks in obese pregnant women who gained weight by over 9 kg  
102 during pregnancy [14]. The relevant literature shows that maternal obesity negatively affects  
103 maternal health during the pregnancy, childbirth, and postpartum periods. In this context, it was  
104 aimed in this study to determine the effects of maternal obesity on some obstetric features.  
105 Based on the literature, the study sought answers to two research questions:

- 106 1. What are the effects of maternal obesity on the obstetric characteristics of women?
- 107 2. What are the relationships between maternal obesity and the obstetric characteristics of  
108 women?

## 109 **Materials and methods**

### 110 **Study design and setting**

111 This study was conducted in a tertiary hospital with a comparative group, cross-sectional and

112 descriptive design. The data of the study were obtained between 15 June and 31 December  
113 2021. The research was carried out in one of the most populated districts of Turkey's 3rd largest  
114 city. There are approximately 5400 births per year in this district.

115 The population of the study consisted of women who gave birth in the hospital where the study  
116 was conducted, who had a BMI in the range of 18.5-24.9 kg/m<sup>2</sup> before pregnancy and those in  
117 the early postpartum period with a BMI higher than 29.9 kg/m<sup>2</sup>. The minimum sample size of  
118 the study was calculated by power analysis. According to the power analysis, a margin of error  
119 ( $\alpha$ ) of 0.05, 95% power to represent the population, and with an effect size of 0.448, the required  
120 sample size was determined as 262 women, including 131 women with obesity problems and  
121 131 women with normal weight [15]. When the effect size was taken as 0.383, the error margin  
122 ( $\alpha$ ) was 0.05, and power to represent the population (confidence interval) was 95%, the required  
123 sample size was calculated as 298 women, including 149 obese women and 149 normal-weight  
124 women [16]. A total of 320 women, 160 women in each group (case and control groups), were  
125 included in the study by considering the possibility of loss of data during the conduct of the  
126 study. The study was completed with 310 women. 155 women with a BMI of >29.9 kg/m<sup>2</sup> and  
127 155 with a BMI in the range of 18.5-24.9 kg/m<sup>2</sup> were included in the study. In the selection of  
128 the sample, the purposive sampling method was used. In the post hoc power analysis of the  
129 study, the 1- $\beta$  value was calculated as 0.99.

130 Purposeful sampling technique was used in this study to reach obese women in the puerperal  
131 period. Not using the randomization method increased the risk of bias. However, the study was  
132 descriptive and included a specific group (maternal obese women).

### 133 **Participants**

134 Pregnant women who volunteered to participate in the study, lived in Burdur province, used

135 herbal products in their current pregnancy, were not diagnosed with a psychological disease  
136 and not receiving any medications, were older than 18 years, were literate in Turkish, and  
137 completely responded to the data collection forms were included in the study. Pregnant women  
138 who did not use herbal products were excluded from the study. Also, pregnant women who did  
139 not meet the inclusion criteria were excluded from the study.

140 Those who gave birth in the hospital, were over the age of 18, could read, write, and speak  
141 Turkish, and didn't have any chronic diseases (e.g., diabetes, hypertension, thyroid diseases),  
142 had pre-pregnancy weight values that could be accessed from their medical records (at the  
143 family health center or hospital), agree to participate in the study, a pre-pregnancy BMI value  
144 of 18.5-24.9 kg/m<sup>2</sup> or >29.9 kg/m<sup>2</sup> depending on their allocation group, were in the first 24  
145 hours of the postpartum period, and did not have physical or mental health problems that would  
146 prevent their participation in the study were included in the study. Women who had a BMI  
147 range of 26.0-29.9 kg/m<sup>2</sup> before pregnancy and those who wanted to leave the study at any  
148 stage of the study were excluded.

#### 149 **Data Collection Tool**

150 The data were obtained with the "Data Collection Form" developed by the researchers in line  
151 with the relevant literature.

152 *Data Collection Form* consisted of questions about the sociodemographic characteristics (age,  
153 current body weight, pre-pregnancy body weight, total weight gained during pregnancy, height,  
154 pre-pregnancy BMI, postpartum BMI, postpartum waist circumference, education, family type,  
155 employment status, income level, place of residence) and obstetric characteristics (parity, time  
156 of childbirth, mode of delivery, labor induction status, status of having an intervention in the  
157 second stage of birth, status of fetal distress development in childbirth, status of hemorrhage in

158 the emergency puerperium period) of the participants [13,17-18].

### 159 **Data collection procedure**

160 According to the classification used in the studies conducted by WHO (2021), CDC (2019),  
161 and NICE (2014), women with a BMI of 30 kg/m<sup>2</sup> or greater are obese, and those with a BMI  
162 in the range of 18.5-24.9 kg/m<sup>2</sup> accepted to have a normal weight [2,5-6]. The women included  
163 in the study were divided into two groups as obese group and normal weight group. The purpose  
164 of the study was explained to the women included in the study and the consent form was signed.  
165 The researcher obtained the data by face-to-face interview technique. The physical  
166 examinations and measurements of the women who were mobilized within the first 24 hours  
167 postpartum were performed, and the necessary information was recorded in the forms.  
168 Additionally, the information given by the participants was confirmed by examining their  
169 hospital record files. Missing data were completed based on information obtained from these  
170 files and from the family health centers where the participants were registered. Filling out the  
171 data collection forms, making the measurements, and conducting the physical examinations  
172 took approximately 20-25 minutes for each participant.

173 Opinions and suggestions of five midwife with Ph.D were taken about the data collection form  
174 developed by the researchers to ensure its validity and applicability. After the final of the data  
175 collection form was given, a pretest was applied to 10 pregnant women (5 experimental and 5  
176 control groups). Pre-tested pregnant women were excluded from the study. While collecting  
177 the data of the study, participants were excluded from the study because 3 women refused to  
178 participate in the study (MO:2, NW:1), 3 participants were under the age of 18 (MO:1, NW:2),  
179 2 participants were illiterate (MO:1, NW:1), 1 participant could not speak Turkish (NW:1), 1  
180 participant did not want to continue the study (MO:1) (Figure 1).



181 **Fig 1. Follow diagram of study**

182 **Data analysis**

183 The analysis of the data obtained in the study was conducted with appropriate statistical  
184 methods in the IBM SPSS Statistics 22 (SPSS Inc., Chicago, IL) program. Descriptive statistics  
185 (mean, standard deviation, frequency, percentage, and distribution range) were used to analyze  
186 the main information. The normality of the distribution of the data was tested by skewness  
187 values, kurtosis values (-1.5-+1.5), and the Kolmogorov-Smirnov test. Parametric tests were  
188 used to analyze the data, as the data were normally distributed. The independent-samples t-test,  
189 Pearson's chi-squared test, and multinomial regression analysis methods were used in the  
190 analyses.  $p < .05$  was considered significant in the interpretations of the results of the analyses.

191 **Ethical aspect of the study**

192 The approval of an Ethics Committee (Decision No: 2021/08-19), the permission of the  
193 institution, and permissions for use of the scales were obtained to conduct the study. The  
194 purpose of the study was verbally explained to the potential participants, and an informed  
195 consent form was signed by those who agreed to participate in the study. The principles of the  
196 Declaration of Helsinki (revised in Brazil 2013) were followed in the research protocol. The  
197 study data were stored within the scope of personal data protection principles. Due to anonymity  
198 and confidentiality, no personally identifiable data such as name and address were obtained. No  
199 women were harmed as a result of this study.

200 **Results**

201 In this study, the participants were divided into two groups: maternally obese (MO: BMI  $> 29.9$   
202  $\text{kg/m}^2$ ) and normal weight (NW: BMI  $18.5\text{-}25.9 \text{ kg/m}^2$ ) groups. The study was completed with

203 a total of 310 puerperium participants, 155 of whom were maternal obese and 155 with normal  
 204 weight (Figure 1). Therefore, their pre-pregnancy weight (MO: 83.50±9.87 kg vs NW:  
 205 56.38±7.15 kg), current weight (MO: 91.14±11.30 kg vs NW: 67.33±8.97 kg), total weight  
 206 gained during pregnancy (MO: 11.08±4.75 kg vs NW: 12.33±6.03 kg), BMI pre-pregnancy  
 207 (MO: 32.53±2.77 kg/m<sup>2</sup> vs NW: 21.85±2.06 kg/m<sup>2</sup>), postpartum BMI (MO: 35.72±3.57 kg/m<sup>2</sup>  
 208 vs NW: 25.96±3.14 kg/m<sup>2</sup>), and postpartum waist circumference (MO: 107.06±9.28 cm vs NW:  
 209 90.97±8.66 cm) variables were significantly different (p<0.05). Additionally, there was a  
 210 significant difference between the groups in terms of their mean ages (MO: 28.78±6.14 vs NW:  
 211 26.89±6.00) and family types (nuclear family; MO: 69.0% vs NW: 82.6%) (p<0.05). The mean  
 212 heights of the participants (MO: 159.95±4.42 cm vs NW: 160.92±5.08 cm), their education  
 213 levels (primary education; ML: 43.9% vs NW: 45.2%), and employment statuses (not working;  
 214 ML: 93.5% vs NW: 92.3%) were not significantly different (p>0.05). There was also no  
 215 significant difference between the groups in terms of their income levels (income less than  
 216 expenditures; MO: 69.0% vs NW: 69.7%) or places of residence (province; MO: 71.0% vs NW:  
 217 78.7%) (p>0.05) (Table 1).

218 **Table 1. Socio-demographic characteristics of the women in the groups (N=310)**

| Variable                                    | Obese Group                           | Normal Weight Group                   | Statistical Test |              |
|---------------------------------------------|---------------------------------------|---------------------------------------|------------------|--------------|
|                                             | (Range)<br>Mean±Standard<br>Deviation | (Range)<br>Mean±Standard<br>Deviation | t                | p            |
| <b>Age</b>                                  | (18-48) 28.78±6.14                    | (18-44) 26.89±6.00                    | -2.741           | <b>0.006</b> |
| <b>Height</b>                               | (150-173) 159.95±4.42                 | (145-174) 160.92±5.08                 | 1.788            | 0.075        |
| <b>Weight Pre-pregnancy</b>                 | (68-120) 83.50±9.87                   | (23-73) 56.38±7.15                    | -27.676          | <b>0.000</b> |
| <b>Current weight</b>                       | (70-140.2) 91.14±11.30                | (40.7-89.6) 67.33±8.97                | -20.532          | <b>0.000</b> |
| <b>Total weight gained during pregnancy</b> | (2-40) 11.08±4.75                     | (-4.3-34) 12.33±6.03                  | 2.030            | <b>0.043</b> |
| <b>BMI Pre-Pregnancy</b>                    | (30-44.9) 32.53±2.77                  | (18.5-25.8) 21.85±2.06                | -38.465          | <b>0.000</b> |

|                                         |                       |          |                       |          |          |              |
|-----------------------------------------|-----------------------|----------|-----------------------|----------|----------|--------------|
| <b>Postpartum BMI</b>                   | (29.3-50.8)35.72±3.57 |          | (18.2-36.6)25.96±3.14 |          | -25.477  | <b>0.000</b> |
| <b>Postpartum Waist Circumference</b>   | (87-130) 107.06±9.28  |          | (68-110) 90.97±8.66   |          | -15.765  | <b>0.000</b> |
| <b>Sociodemographic Characteristics</b> | <b>N</b>              | <b>%</b> | <b>N</b>              | <b>%</b> | $\chi^2$ | <b>p</b>     |
| <b>Education level</b>                  |                       |          |                       |          |          |              |
| Literate                                | 51                    | 32.9     | 47                    | 30.3     | 4.371    | 0.224        |
| Primary education                       | 68                    | 43.9     | 70                    | 45.2     |          |              |
| High school                             | 33                    | 21.3     | 28                    | 18.1     |          |              |
| Bachelor's degree and above             | 3                     | 1.9      | 10                    | 6.5      |          |              |
| <b>Family type</b>                      |                       |          |                       |          |          |              |
| Nuclear                                 | 107                   | 69.0     | 128                   | 82.6     | 7.757    | <b>0.005</b> |
| Extended                                | 48                    | 31.0     | 27                    | 17.4     |          |              |
| <b>Working status</b>                   |                       |          |                       |          |          |              |
| Working                                 | 10                    | 6.5      | 11                    | 7.1      | 1.062    | 0.588        |
| Not working                             | 145                   | 93.5     | 143                   | 92.3     |          |              |
| <b>Income</b>                           |                       |          |                       |          |          |              |
| Income less than expenses               | 107                   | 69.0     | 108                   | 69.7     | 0.016    | 0.992        |
| Income equals expenses                  | 45                    | 29.0     | 44                    | 28.4     |          |              |
| Income more than expenses               | 3                     | 1.9      | 3                     | 1.9      |          |              |
| <b>Place of residence</b>               |                       |          |                       |          |          |              |
| Province                                | 110                   | 71.0     | 122                   | 78.7     | 4.284    | 0.117        |
| District                                | 34                    | 21.9     | 29                    | 18.7     |          |              |
| Rural                                   | 11                    | 7.1      | 4                     | 2.6      |          |              |

219 t: Independent-samples t-test,  $\chi^2$ : Chi-squared test

220 The majority of the participants in both groups were multiparous (MO: 80.6% vs NW: 70.3%)  
 221 and gave birth at term (MO: 79.4% vs NW: 85.2%). Additionally, post-mature births were seen  
 222 significantly more commonly in the obese group (MO: 7.1% vs NW: 1.3%) ( $p < 0.05$ ). There  
 223 was no significant difference between the groups in terms of their modes of delivery, their  
 224 statuses of receiving labor induction, and their statuses of undergoing any intervention status in  
 225 the second stage of labor ( $p > 0.05$ ). It was observed that fetal distress at birth developed only in  
 226 the infants of the participants in the obese group (MO: 20.6% vs NW: 0.0%), and moderate  
 227 hemorrhage was observed significantly more frequently in the obese group (MO: 51.6% vs

228 NW: 32.3%) (p<0.05) (Table 2).

229 **Table 2. Obstetric characteristics of the women in the groups (N=310)**

| Variable                                                   | Obese Group |      | Normal Weight Group |       | $\chi^2$ | p            |
|------------------------------------------------------------|-------------|------|---------------------|-------|----------|--------------|
|                                                            | N           | %    | N                   | %     |          |              |
| <b>Parity</b>                                              |             |      |                     |       |          |              |
| Primiparous                                                | 30          | 19.4 | 46                  | 29.7  | 4.462    | <b>0.035</b> |
| Multiparous                                                | 125         | 80.6 | 109                 | 70.3  |          |              |
| <b>Time of childbirth</b>                                  |             |      |                     |       |          |              |
| At term                                                    | 123         | 79.4 | 132                 | 85.2  | 6.548    | <b>0.038</b> |
| Preterm                                                    | 21          | 13.5 | 21                  | 13.5  |          |              |
| Postterm                                                   | 11          | 7.1  | 2                   | 1.3   |          |              |
| <b>Birth Type</b>                                          |             |      |                     |       |          |              |
| Vaginal birth                                              | 55          | 35.5 | 47                  | 30.3  | 0.935    | 0.334        |
| Cesarean section birth                                     | 100         | 64.5 | 108                 | 69.7  |          |              |
| <b>Labor process<sup>a</sup></b>                           |             |      |                     |       |          |              |
| Spontaneous                                                | 26          | 17.2 | 24                  | 15.5  | 1.716    | 0.424        |
| Oxytocin induction                                         | 33          | 21.9 | 26                  | 16.8  |          |              |
| Cesarean section                                           | 92          | 60.9 | 105                 | 67.7  |          |              |
| <b>Had any intervention in the second stage of birth</b>   |             |      |                     |       |          |              |
| Yes <sup>b</sup>                                           | 22          | 14.2 | 21                  | 13.5  | 0.027    | 0.869        |
| No                                                         | 133         | 85.8 | 134                 | 86.5  |          |              |
| <b>Developed fetal distress in childbirth</b>              |             |      |                     |       |          |              |
| Yes                                                        | 13          | 20.6 | 0                   | 0.0   | 11.659   | <b>0.001</b> |
| No                                                         | 50          | 79.4 | 50                  | 100.0 |          |              |
| <b>Urgent puerperium hemorrhage status (observational)</b> |             |      |                     |       |          |              |
| Mild hemorrhage                                            | 70          | 45.2 | 100                 | 64.2  | 12.217   | <b>0.002</b> |
| Moderate hemorrhage                                        | 80          | 51.6 | 50                  | 32.3  |          |              |
| Severe hemorrhage                                          | 5           | 3.2  | 5                   | 3.2   |          |              |

230 <sup>a</sup>Data of 4 participants could not be reached, <sup>b</sup>Episiotomy, Vacuum, Forceps, Fundal pressure,  
 231  $\chi^2$ : Chi-squared test

232 In the logistic regression analysis, maternal obesity was found to increase the rates of  
 233 multiparity by 1.758 times (1.038-2.978 %95 CI, p=0.036), post-maturity by 5.902 times  
 234 (1.283-27.164 %95 CI, p=0.023) and moderate postpartum hemorrhage by 2.286 times (1.433-  
 235 3.646 %95 CI, p=0.001) (Table 3).

236 **Table 3. Regression analysis of some obstetric characteristics of women (N=310)**

|                              |             | <b>B</b> | <b>Wald</b> | <b>Exp (B)</b> | <b>95% confidence interval</b> |              | <b>p</b>     |
|------------------------------|-------------|----------|-------------|----------------|--------------------------------|--------------|--------------|
| <b>Parity</b>                |             |          |             |                | <b>Lower</b>                   | <b>Upper</b> |              |
| Primiparous <sup>a</sup>     |             |          |             |                |                                |              |              |
| Multiparous                  | obese women | 0.564    | 4.409       | 1.758          | 1.038                          | 2.978        | <b>0.036</b> |
| <b>Time of childbirth</b>    |             |          |             |                |                                |              |              |
| At term <sup>a</sup>         |             |          |             |                |                                |              |              |
| Preterm                      | obese women | 0.71     | 0.045       | 1.073          | 0.559                          | 2.062        | 0.832        |
| Postterm                     |             | 1.775    | 5.196       | 5.902          | 1.283                          | 27.164       | <b>0.023</b> |
| <b>Postpartum hemorrhage</b> |             |          |             |                |                                |              |              |
| Mild hemorrhage <sup>a</sup> |             |          |             |                |                                |              |              |
| Moderate hemorrhage          | obese women | 0.827    | 12.035      | 2.286          | 1.433                          | 3.646        | <b>0.001</b> |
| Severe hemorrhage            |             | 0.357    | 0.300       | 1.429          | 0.399                          | 5.121        | 0.584        |

237 <sup>a</sup>Referans kategorisi

238 No interventional application was made to women during the data collection process. In  
 239 addition, no direction was given that could lead to negative attitude and behavior changes. The  
 240 study did not have any side effects or adverse effects on participants.

## 241 Discussion

242 In this study, the effects of maternal obesity on some obstetric characteristics of women were  
 243 examined. It was determined that the majority of the obese participants were multiparous and  
 244 gave birth at term. Additionally, postterm delivery and moderate postpartum hemorrhage were  
 245 observed more frequently in the obese group. Maternal obesity was determined to increase the  
 246 rates of multiparity (1.758 times), post-maturity (5.902 times), and moderate postpartum  
 247 hemorrhage (2.286 times). Fetal distress at birth developed only in the infants of the obese  
 248 participants. There was no significant difference between the groups in terms of their modes of  
 249 delivery, labor induction statuses, and statuses of undergoing intervention in the second stage  
 250 of labor.

251 Studies have shown multiparity as one of the causes of weight gain in women of reproductive

252 age. In most of such studies, a positive association between parity and weight gain or BMI has  
253 been reported [19-20]. In one study, it was determined that overweight women were more likely  
254 to be unable to lose the weight they gained during pregnancy than underweight women were  
255 [21]. Gestational weight gain was also found to negatively affect the return to pre-pregnancy  
256 weight and postpartum weight loss [19]. Parity was positively associated with long-term obesity  
257 risk among Chinese women [20]. A positive correlation was also observed between numbers of  
258 deliveries and obesity in Iranian women. In particular, it was shown that high parity was  
259 associated with BMI [22]. In this case, it can be stated that multiparous women have a higher  
260 risk of obesity.

261 Pregnancies lasting longer than 40 weeks were associated with maternal obesity and especially  
262 morbid obesity (*OR*:2.32, *95% CI*:1.73–3.12) [23]. Similarly, post-maturity was observed in  
263 obese women in a retrospective study in Russia [24]. Studies have reported higher rates of post-  
264 maturity in obese people [18, 25]. In one study, it was stated that the incidence of preterm  
265 childbirth was lower in obese women compared to non-obese women.<sup>25</sup> In a systematic review,  
266 the risk of preterm birth was not found to be significantly different in infants whose mothers  
267 were overweight or obese [26]. In two cohort studies, however, the risk of preterm childbirth  
268 was found to be higher in overweight and obese women than in normal-weight women [27-28].  
269 It was observed that the sample sizes of the aforementioned studies were quite large. These  
270 differences may be due to the differences among their sample sizes. Based on the information  
271 obtained, no clear conclusion could be reached about the relationship between preterm  
272 childbirth and obesity.

273 The likelihood of postpartum hemorrhage is moderately increased in obese women compared  
274 to women with normal BMI [29]. In a previous study, it was found that obesity did not increase  
275 the occurrence of severe hemorrhage [30]. In a study conducted in the Netherlands, obesity was

276 not found to be associated with major obstetric hemorrhage[31]. In another study, it was  
277 reported that obesity did not affect postpartum hemorrhage status [32]. NICE (2017)  
278 emphasized that a BMI of 35 kg/m<sup>2</sup> or above increases the risk of postpartum hemorrhage [33].  
279 Meta-analysis studies have confirmed that a BMI of 25.00 kg/m<sup>2</sup> or above increases the risk of  
280 postpartum hemorrhage [17, 34-35]. Similar to studies with high levels of evidence, postpartum  
281 hemorrhage was observed in the obese participants in this study, and it can be argued that  
282 obesity increases the risk of hemorrhage.

283 In a systematic review, infants whose mothers were overweight or obese were found to be at a  
284 higher risk of stillbirth than infants whose mothers were of normal weight [26]. Similarly,  
285 another study revealed that overweight or obese women have higher rates of stillbirth and  
286 neonatal death than those of normal weight [36]. Intrauterine hypoxia was observed in the  
287 infants of women with 3rd obesity [24]. The infants of obese women have a higher risk of  
288 developing fetal distress compared to the infants of normal-weight women (*OR*:2.67, 95%  
289 *CI*:1.18–3.58) [37]. The results of other studies in the relevant literature and those of this study  
290 suggested the infants of obese women have a higher risk of developing fetal distress during  
291 birth.

292 In a previous study, there was no significant difference between obese women and normal-  
293 weight women in terms of their modes of delivery [30]. In a study conducted in China, it was  
294 stated that the rates of cesarean section deliveries were very high, and the increased prevalence  
295 of obesity in women was among the reasons that could explain the high cesarean rates [38]. In  
296 another study, increased BMI was associated with the likelihood of cesarean section.  
297 Overweight and obese women were found to have a 1.58 to 2.75-fold greater risk of cesarean  
298 section deliveries [39]. In this study, no significant difference was found between the normal  
299 weight and obese groups in terms of their modes of delivery. In our country, Cesarean section

300 is perceived as a painless mode of delivery and is generally preferred by individuals with high  
301 socio-economic status. Since the institution where this study was conducted is a public hospital,  
302 usually individuals with low socio-economic status present to the institution. Moreover,  
303 cesarean delivery in the institution is performed based on necessity, not preference. There may  
304 not have been a difference between the groups due to the low socio-economic levels of the  
305 women included in the study and the fact that cesarean section was not optional.

306 One study showed that the rates of spontaneous labor initiation were higher than predicted in  
307 obese pregnant women. However, the authors determined that the rate of spontaneous labor was  
308 lower in obese women compared to normal-weight women. Moreover, in the same study, it was  
309 observed that the need for labor induction was more prevalent in obese women compared to  
310 normal-weight women [32]. In another study, BMI was found to not affect the rates of deliveries  
311 requiring intervention [39]. It was reported that as BMI increased, the rate of spontaneous labor  
312 decreased [40]. In a meta-analysis study, it was found that the incidence of vaginal childbirth  
313 requiring intervention was higher in obese women.

### 314 **Strengths and Limitations**

315 There were some limitations in this study. The fact that the patient rooms in the maternity ward  
316 of the hospital where this study was conducted have 4 or more beds, and there are baby-sized  
317 beds next to the mothers' beds may have caused the space to narrow and the room to be crowded  
318 and noisy. For this reason, there was difficulty in creating sufficient space and establishing  
319 communication while measurements were being made. Additionally, due to the COVID-19  
320 pandemic that emerged during the data collection process, the access of health workers working  
321 in external units to the gynecology service was restricted, the families were more anxious, and  
322 the unit's employees preferred their procedures to be performed with less contact. Women in



323 the mildly obese category were not included in this study. Thus, the results might not apply to  
324 women who are mildly obese.

325 The strength of this study is that there a strong correlation was found between maternal obesity  
326 and some complications in childbirth and the postpartum period. The significance of these  
327 findings can be examined from different perspectives. The results indicate the need for advice  
328 and counseling programs for obese women to lose weight before pregnancy. They also point to  
329 the classification of obese pregnancies as high-risk pregnancies and the provision of appropriate  
330 antenatal care to these women. Additionally, they suggest that widespread obesity among  
331 women of reproductive age is associated with several health risks for women later in life.

## 332 **Conclusion**

333 In this study, it was determined that the majority of the participants in the maternally obese  
334 group were multiparous and gave birth at term. However, postterm birth and moderate  
335 postpartum hemorrhage were found to be more common in the obese group. Fetal distress in  
336 childbirth developed only in the infants of the obese women. It is important to provide  
337 counseling or referral to a nutrition and dietetics specialist so that women who have obesity  
338 problems in the preconception period can reach normal BMI values. As the number of deliveries  
339 increases, the risk of obesity increases, and midwives should provide counseling to women  
340 about healthy nutrition and weight control during both the pregnancy and postpartum periods.  
341 Starting from the pre-pregnancy period until the end of the postpartum period, midwives have  
342 an important role in providing the necessary attention and care to mothers with obesity problems  
343 and regulating healthy lifestyle habits and behaviors. To prevent obesity, which is a health  
344 problem of our age, and the complications it causes and develop potential interventions, it is  
345 recommended to conduct extensive research on factors related to maternal obesity and make

346 sense of the associated mechanisms.

## 347 **References**

- 348 1. Centers for Disease Control and Prevention. Adult obesity facts [Internet]. Centers for  
349 Disease Control and Prevention: 2022. [cited 2022 July 30]. Available from:  
350 <https://www.cdc.gov/obesity/data/adult.html#:~:text=Obesity%20is%20a%20common%2C%20%2020serious.from%204.7%25%20to%209.2%25>  
351
- 352 2. Centers for Disease Control and Prevention. Disability and obesity [Internet]. Centers  
353 for Disease Control and Prevention: 2019. [cited 2022 July 29]. Available from:  
354 <https://www.cdc.gov/ncbddd/disabilityandhealth/obesity.html#:~:text=An%20adult%20who%20has%20a,or%20higher%20is%20considered%20obese>  
355
- 356 3. The American College of Obstetricians and Gynecologists (ACOG). Obesity and  
357 pregnancy [Internet]. The American College of Obstetricians and Gynecologists: 2021.  
358 [cited 2022 July 27]. Available from: <https://www.acog.org/womens-health/faqs/obesity-and%20pregnancy#:~:text=Being%20overweight%20is%20defined%20as,BMI%20of%2030%20to%2034.9>  
359
- 360 4. Simko M, Totka A, Vondrova D, Samohyl M, Jurkovicova J, Trnka M, et al. Maternal  
361 Body Mass Index and Gestational Weight Gain and Their Association with Pregnancy  
362 Complications and Perinatal Conditions. *Int. J. Environ. Res. Public Health*  
363 2019;16(10):1751. PMID: 31108864 <https://doi.org/10.3390/ijerph16101751>  
364
- 365 5. National Institute for Health and Care Excellence (NICE). Obesity: identification,  
366 assessment and management [Internet]. NICE: 2014. [cited 2022 July 27]. Available  
367 from: <https://www.nice.org.uk/guidance/cg189/ifp/chapter/obesity-and-being-%20%20overweight#:~:text=What%20BMI%20means%20for%20adults,40%20or%20more%20%E2%80%93%20severely%20obese>  
368
- 369 6. WHO. Obesity and overweight [Internet]. WHO: 2021. [cited 2022 July 31]. Available  
370 from: <https://www.who.int/news-room/fact-sheets/detail/obesity-and-overweight>  
371
- 372 7. Hacettepe University Institute of Population Studies. 2018 Turkey Demographic and  
373 Health Survey [Internet]. Hacettepe University Institute of Population Studies, T.R.  
374 Presidency of Turkey Directorate of Strategy and Budget and the Scientific and  
375 Technological Research Council of Turkey (TÜBİTAK), Ankara, Türkiye: 2019. [cited  
376 2022 July 27]. Available from: [http://www.sck.gov.tr/wp-content/uploads/2020/08/TNSA2018\\_ana\\_Rapor.pdf](http://www.sck.gov.tr/wp-content/uploads/2020/08/TNSA2018_ana_Rapor.pdf)  
377
- 378 8. Hill B, McPhie S, Moran LJ, Harrison P, Huang TTK, Teede H, et al. Lifestyle  
379 intervention to prevent obesity during pregnancy: Implications and recommendations  
380 for research and implementation. *Midwifery* 2017;49:13-18. PMID: 27756642  
381 <https://doi.org/10.1016/j.midw.2016.09.017>  
382
- 383 9. Vitner D, Harris K, Maxwell C, Farine D. Obesity in pregnancy: a comparison of four  
384 national guidelines. *J Matern Fetal Neonatal Med* 2019;32(15):2580-2590. PMID:  
385 29447091 <https://doi.org/10.1111/j.14710528.2004.00546.x>  
386
- 387 10. The Royal College of Obstetricians and Gynaecologists (RCOG). Care of women with  
388 obesity in pregnancy (Green-top Guideline No. 72) [Internet]. The Royal College of  
Obstetricians and Gynaecologists: 2018. [cited 2022 July 27]. Available from:

- 389 [https://www.rcog.org.uk/guidance/browse-all-guidance/green-top-guidelines/care-of-](https://www.rcog.org.uk/guidance/browse-all-guidance/green-top-guidelines/care-of-women-with-obesity-in-pregnancy-green-top-guideline-no-72/)  
390 [women-with-obesity-in-pregnancy-green-top-guideline-no-72/](https://www.rcog.org.uk/guidance/browse-all-guidance/green-top-guidelines/care-of-women-with-obesity-in-pregnancy-green-top-guideline-no-72/)
- 391 11. Luccisano SP, Weber HC, Murfet GO, Robertson IK, Prior SJ, Hills AP. An audit of  
392 pre-pregnancy maternal obesity and diabetes screening in rural regional tasmania its  
393 impact on pregnancy and neonatal outcomes. *Int J Environ Res Public Health*  
394 2021;18(22):12006. PMID: 34831762 <https://doi.org/10.3390/ijerph182212006>.
  - 395 12. Gaillard R. Maternal obesity during pregnancy and cardiovascular development and  
396 disease in the offspring. *Eur J Epidemiol* 2015;30(11):1141-1152. PMID: 26377700  
397 <https://doi.org/10.1007/s10654-015-0085-7>
  - 398 13. Marchi J, Berg M, Dencker A, Olander EK, Begley C. Risks associated with obesity in  
399 pregnancy, for the mother and baby: a systematic review of reviews. *Obesity Reviews*  
400 2015;16(8):621-638. PMID: 26016557 <https://doi.org/10.1111/obr.12288>
  - 401 14. Thompson AM, Thompson JA. An evaluation of whether a gestational weight gain of 5  
402 to 9 kg for obese women optimizes maternal and neonatal health risks. *BMC Pregnancy*  
403 *Childbirth* 2019;19(1):126. PMID: 30975086 [https://doi.org/10.1186/s12884-019-](https://doi.org/10.1186/s12884-019-2273-z)  
404 [2273-z](https://doi.org/10.1186/s12884-019-2273-z)
  - 405 15. Kılıç M, Erci B. The effect of the care provided based on self-care model of orem on  
406 self-care agency and frequency of nursing diagnoses in pregnant women with threat of  
407 preterm birth. *Turkiye Klinikleri J Nurs Sci* 2017;9(1):1-14.  
408 <https://doi.org/0.5336/nurses.2015-49259>
  - 409 16. Batman D, Şeker S. The Effect of Web Based Education on the Level of Self-  
410 Confidence and Anxiety in Care of Parents of Premature Infants. *DEUHFED*  
411 2019;12(2):107-115. <https://dergipark.org.tr/en/pub/deuhfed/issue/54241/735027>
  - 412 17. Durmaz A, Komurcu N. Relationship between maternal characteristics and postpartum  
413 hemorrhage: a meta-analysis study. *JNR* 2018;26(5):362-372. PMID: 29219937  
414 <https://doi.org/10.1097/jnr.0000000000000245>
  - 415 18. Salameh K, Al-Bedaywi R, Habboub L, Elkabir NA, Tomerak A. Extremely Post-Term  
416 Infant with Adverse Outcome. *Clin Res Pediatr* 2018;1(2):1-4.  
417 <https://doi.org/10.33309/2638-7654.010208>
  - 418 19. Rebholz SL, Jones T, Burke KT, Jaeschke A, Tso P, D'Alessio DA, et al. Multiparity  
419 leads to obesity and inflammation in mothers and obesity in male offspring. *American*  
420 *Journal of Physiology-Endocrinology and Metabolism* 2012;302(4):E449-E457. PMID:  
421 22127227 <https://doi.org/10.1152/ajpendo.00487.2011>
  - 422 20. Li W, Wang Y, Shen L, Song L, Li H, Liu B, et al. Association between parity and  
423 obesity patterns in a middle-aged and older Chinese population: a cross-sectional  
424 analysis in the Tongji-Dongfeng cohort study. *Nutr Metab* 2016;13(1):1-8. PMID:  
425 27795732 <https://doi.org/10.1186/s12986-016-0133-7>
  - 426 21. Rooney BL, Schauburger CW. Excess pregnancy weight gain and long-term obesity:  
427 one decade later. *Obstet Gynecol* 2002;100(2):245-252. PMID: 12151145  
428 [https://doi.org/10.1016/S0029-7844\(02\)02125-7](https://doi.org/10.1016/S0029-7844(02)02125-7)
  - 429 22. Hajiahmadi M, Shafi H, Delavar MA. Impact of parity on obesity: a cross-sectional  
430 study in Iranian women. *Med Princ Pract* 2015;24(1):70-74. PMID: 25402350  
431 <https://doi.org/10.1159/000368358>
  - 432 23. Woolner AM, Bhattacharya S. Obesity and stillbirth. *Best Pract Re Clin Obstet*  
433 *Gynaecol* 2015;29(3):415-426. PMID: 25457855  
434 <https://doi.org/10.1016/j.bpobgyn.2014.07.025>.

- 435 24. Akhmetovna KL, Eduardovna TA, Vladimirovna CL, Vladislavovich MN. Metabolic  
436 disturbances in obese pregnant residents of an industrial region (The Urals, Russia).  
437 *Oman Med J* 2016;31(3):211. PMID: 27162592 <https://doi.org/10.5001/omj.2016.40>
- 438 25. Dixit A, Girling JC. Obesity and pregnancy. *Journal of Obstetrics and Gynaecology*  
439 2008;28(1):14-23. PMID: 18259892 <https://doi.org/10.1080/01443610701814203>
- 440 26. Liu P, Xu L, Wang Y, Zhang Y, Du Y, Sun Y, et al. Association between perinatal  
441 outcomes and maternal pre-pregnancy body mass index. *Obesity Reviews*  
442 2016;17(11):1091-1102. PMID: 27536879 <https://doi.org/10.1111/obr.12455>
- 443 27. Bacărea A, Bacărea VC, Tarcea M. The relation between prepregnancy maternal body  
444 mass index and total gestational weight gain with the characteristics of the newborns. *J*  
445 *Matern Fetal Neonatal Med* 2020;35(17):3284-3289. PMID: 32924693  
446 <https://doi.org/10.1080/14767058.2020.1818205>
- 447 28. Sobczyk K, Holecki T, Woźniak-Holecka J, Grajek M. Does Maternal Obesity Affect  
448 Preterm Birth? Documentary Cohort Study of Preterm in Firstborns—Silesia (Poland).  
449 *Children* 2022;9(7):1007. PMID: 35883991 <https://doi.org/10.3390/children9071007>
- 450 29. Butwick AJ, Abreo A, Bateman BT, Lee HC, El-Sayed YY, Stephansson O, et al. Effect  
451 of maternal body mass index on postpartum hemorrhage. *Anesthesiology*  
452 2018;128(4):774-783. <https://doi.org/10.1097/ALN.0000000000002082>
- 453 30. Pallasmaa N, Ekblad U, Gissler M, Alanen A. The impact of maternal obesity, age, pre-  
454 eclampsia and insulin dependent diabetes on severe maternal morbidity by mode of  
455 delivery—a register-based cohort study. *Arch Gynecol Obstet* 2015;291(2):311-318.  
456 PMID: 25115277 <https://doi.org/10.1007/s00404-014-3352-z>
- 457 31. Witteveen T, Zwart JJ, Gast KB, Bloemenkamp KW, van Roosmalen J. Overweight and  
458 severe acute maternal morbidity in a low-risk pregnant population in the Netherlands.  
459 *PLoS One* 2013;8(9):e74494. PMID: 24069316  
460 <https://doi.org/10.1371/journal.pone.0074494>
- 461 32. Lauth C, Huet J, Dolley P, Thibon P, Dreyfus M. Maternal obesity in prolonged  
462 pregnancy: Labor, mode of delivery, maternal and fetal outcomes. *J Gynecol Obstet*  
463 *Hum Reprod* 2021;50(1):101909. PMID: 32927107  
464 <https://doi.org/10.1016/j.jogoh.2020.101909>
- 465 33. National Institute for Health and Care Excellence. Intrapartum care: Care of healthy  
466 women and their babies during childbirth. NICE: 2017. Available from:  
467 <https://www.nice.org.uk/guidance/cg190/evidence/full-guideline-pdf-248734770>  
468 Accessed: 2023 February 12
- 469 34. Higgins N, Patel SK, Toledo P. Postpartum hemorrhage revisited: new challenges and  
470 solutions. *Curr Opin Anesthesiol* 2019;32(3):278-284. PMID: 31045634  
471 <https://doi.org/10.1097/ACO.0000000000000717>
- 472 35. Ende HB, Lozada MJ, Chestnut DH, Osmundson SS, Walden RL, Shotwell MS, et al.  
473 Risk factors for atonic postpartum hemorrhage: a systematic review and meta-analysis.  
474 *Obstet Gynecol* 2021;137(2):305. PMID: 33417319  
475 <https://doi.org/10.1097/AOG.0000000000004228>
- 476 36. Yu YH, Bodnar LM, Himes KP, Brooks MM, Naimi AI. Association of overweight and  
477 obesity development between pregnancies with stillbirth and infant mortality in a cohort  
478 of multiparous women. *Obstet Gynecol* 2020;135(3):634. PMID: 32028483  
479 <https://doi.org/10.1097/AOG.0000000000003677>
- 480 37. Frolova AI, Raghuraman N, Stout MJ, Tuuli MG, Macones GA, Cahill AG. Obesity,  
481 second stage duration, and labor outcomes in nulliparous women. *Am J Perinatol*  
482 2021;38(04):342-349. PMID: 31563134 <https://doi.org/10.1055/s-0039-1697586>

- 483 38. Mi J, Liu F. Rate of caesarean section is alarming in China. *Lancet*  
484 2014;383(9927):1463-1464. PMID: 24766963 <https://doi.org/10.1016/S0140->  
485 [6736\(14\)60716-9](https://doi.org/10.1016/S0140-6736(14)60716-9)
- 486 39. Angeliki A, Dimitrios P, Chara T. Maternal obesity and its association with the mode  
487 of delivery and the neonatal outcome in induced labour: implications for midwifery  
488 practice. *Eur J Midwifery* 2018;2:4. PMID: 33537565  
489 <https://doi.org/10.18332/ejm/85792>
- 490 40. Harper LM, Caughey AB, Odibo AO, Roehl KA, Zhao Q, Cahill AG. Normal progress  
491 of induced labor. *Obstet Gynecol* 2012;119(6):1113-1118. PMID: 22569121  
492 <https://doi.org/10.1097/AOG.0b013e318253d7aa>

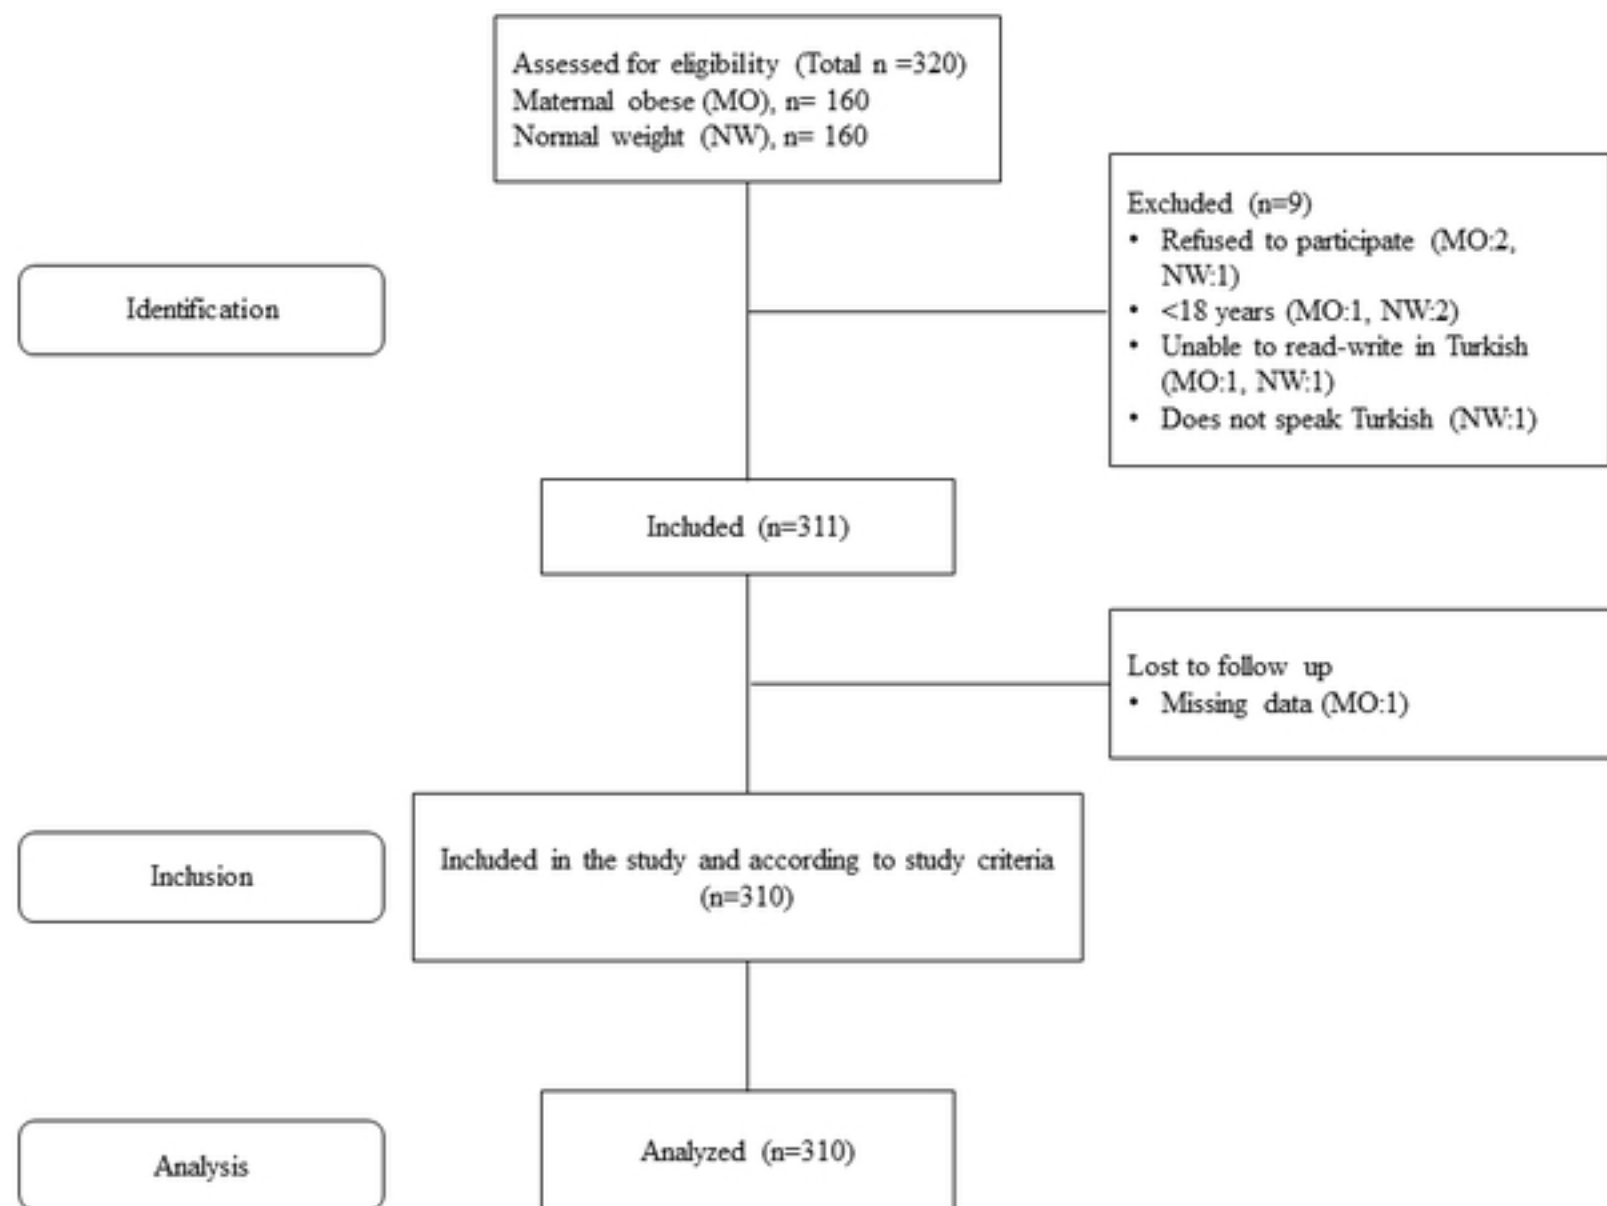

Figure
